# Supplementary material
Source: PubMed Central journal article supplement (PMC3307276)
Supplement: supp_M111.309385_jbc.M111.309385-1.pdf [file supp_M111.309385_jbc.M111.309385-1.pdf]

**Supplementary Table 1. Summary of hit compounds from Pin1-Tau PCA screen**

| <b>Compound</b>             | <b>Class</b>       | <b>Mechanism of action</b>                            | <b>Primary screen</b><br>(fold of control;<br>average ± st dev) | <b>Supplier</b>                          |
|-----------------------------|--------------------|-------------------------------------------------------|-----------------------------------------------------------------|------------------------------------------|
| Acetylsulfisoxazole         | Antibacterial      | Sulfonamide                                           | 2.6 ± 1.2                                                       | University of Helsinki Pharmacy, Finland |
| Allobarbital                | Barbiturate        | GABA <sub>A</sub> R modulation                        | 3.1 ± 1.2                                                       | University of Helsinki Pharmacy, Finland |
| Atropine methyl nitrate     | Anticholinergic    | Muscarinic antagonist                                 | 2.8 ± 0.8                                                       | Merck, USA                               |
| Busulfan                    | Alkyl sulfonate    | Antineoplastic                                        | 2.6 ± 0.6                                                       | University of Helsinki Pharmacy, Finland |
| Butethal                    | Barbiturate        | GABA <sub>A</sub> R modulation                        | 3.4 ± 0.9                                                       | University of Helsinki Pharmacy, Finland |
| Butidrine                   | Adrenergic         | β antagonist                                          | 2.7 ± 0.6                                                       | Simes, Italy                             |
| Cetrimonium bromide         | Topical antiseptic | Cationic surfactant                                   | 5.2 ± 1.2                                                       | University of Helsinki Pharmacy, Finland |
| Chlorothiazide              | Diurete            | Na <sup>+</sup> -Cl <sup>-</sup> Symporter inhibition | 2.6 ± 0.7                                                       | Byron Chemical Company, USA              |
| Cinchophen                  | Analgesic          | -                                                     | 2.7 ± 0.8                                                       | H. Lundbeck, Denmark                     |
| Clopentixol dihydrochloride | Antipsychotic      | D1R/D2R antagonist                                    | 3.7 ± 0.5                                                       | H. Lundbeck, Denmark                     |
| Dequalinium chloride        | Antiseptic         | Bisquaternary quinolinium                             | 2.6 ± 0.9                                                       | Oriola, Finland                          |
| Desalkylflurazepam          | Benzodiazepine     | GABA <sub>A</sub> R modulation                        | 3.5 ± 1.1                                                       | University of Helsinki Pharmacy, Finland |
| Dexbrompheniramine maleate  | Antiallergic       | Histamine H1R antagonist                              | 3.4 ± 0.6                                                       | University of Helsinki Pharmacy, Finland |
| Dexchlorpheniramine maleate | Antiallergic       | Histamine H1R antagonist                              | 2.5 ± 0.7                                                       | Tamro, Finland                           |
| Diazepam                    | Benzodiazepine     | GABA <sub>A</sub> R modulation                        | 2.9 ± 0.9                                                       | Farmos, Finland                          |
| Dicumarol                   | Anticoagulant      | Competitive inhibitor of vitamin K                    | 0.7 ± 0.1                                                       | Merck, USA                               |
| Folic acid                  | Vitamin            | One-carbon metabolism                                 | 0.7 ± 0.2                                                       | University of Helsinki Pharmacy, Finland |
| Mepivacaine HCl             | Local anesthetic   | Na <sup>+</sup> -channel inhibition                   | 0.7 ± 0.1                                                       | Ab Bofors, Sweden                        |
| Octopamine HCl              | Biogenic amine     | Adrenergic                                            | 2.1 ± 0.6                                                       | Supro Troponwerke Köln, Germany          |
| Pentobarbital               | Barbiturate        | GABA <sub>A</sub> R modulation                        | 2.1 ± 0.3                                                       | Sigma, USA                               |
| Phthalylsulfathiazole       | Antibacterial      | Sulfonamide                                           | 2.2 ± 0.5                                                       | Arkadia Pharmacy, Finland                |
| Selegiline HCl              | Antiparkinsonian   | MAO inhibition                                        | 3.5 ± 1.6                                                       | Orion Pharma, Finland                    |
| Sulfameter                  | Antibacterial      | Sulfonamide                                           | 2.1 ± 0.2                                                       | Orion Pharma, Finland                    |
| Tolbutamide                 | Hypoglycemic       | K <sup>+</sup> -channel blocker                       | 2.2 ± 0.6                                                       | Novo Nordisk, Denmark                    |
