# Supplementary material
Source: PubMed Central journal article supplement (PMC3307276)
Supplement: supp_M111.309385_jbc.M111.309385-2.pdf [file supp_M111.309385_jbc.M111.309385-2.pdf]

**Supplementary Table 2. Summary of hit compounds selected for secondary screening and mechanistic studies**

| <b>Compound</b>             | <b>Class</b>     | <b>Mechanism of action</b>     | <b>Primary screen</b><br>(fold of control;<br>average ± st dev) | <b>Average effect</b><br>(n=4 repeats;<br>fold of control) | <b>Supplier</b>                          |
|-----------------------------|------------------|--------------------------------|-----------------------------------------------------------------|------------------------------------------------------------|------------------------------------------|
| Desalkylflurazepam          | Benzodiazepine   | GABA <sub>A</sub> R modulation | 3.5 ± 1.1                                                       | 2.1 ± 0.14                                                 | University of Helsinki Pharmacy, Finland |
| Clopentixol dihydrochloride | Antipsychotic    | D1R/D2R antagonist             | 3.7 ± 0.5                                                       | 2.0 ± 0.21                                                 | H. Lundbeck, Denmark                     |
| Allobarbital                | Barbiturate      | GABA <sub>A</sub> R modulation | 3.1 ± 1.2                                                       | 1.9 ± 0.38                                                 | University of Helsinki Pharmacy, Finland |
| Butethal                    | Barbiturate      | GABA <sub>A</sub> R modulation | 3.4 ± 0.9                                                       | 1.9 ± 0.12                                                 | University of Helsinki Pharmacy, Finland |
| Acetylsulfisoxazole         | Antibacterial    | Sulfonamide                    | 2.6 ± 1.2                                                       | 1.9 ± 0.70                                                 | University of Helsinki Pharmacy, Finland |
| Selegiline HCl              | Antiparkinsonian | MAO inhibition                 | 3.5 ± 1.6                                                       | 1.8 ± 0.20                                                 | Orion Pharma, Finland                    |
| Diazepam                    | Benzodiazepine   | GABA <sub>A</sub> R modulation | 2.9 ± 0.9                                                       | 1.7 ± 0.42                                                 | Farmos, Finland                          |
| Sulfameter                  | Antibacterial    | Sulfonamide                    | 2.1 ± 0.2                                                       | 1.6 ± 0.71                                                 | Orion Pharma, Finland                    |
| Dexbrompheniramine maleate  | Antiallergic     | Histamine H1R antagonist       | 3.4 ± 0.6                                                       | 1.5 ± 0.71                                                 | University of Helsinki Pharmacy, Finland |
| Octopamine HCl              | Biogenic amine   | Adrenergic                     | 2.1 ± 0.6                                                       | 1.4 ± 0.57                                                 | Supro Troponwerke Köln, Germany          |
| Pentobarbital               | Barbiturate      | GABA <sub>A</sub> R modulation | 2.1 ± 0.3                                                       | 1.4 ± 0.28                                                 | Sigma, USA                               |
| Tolbutamide                 | Hypoglycemic     | K-channel blocker              | 2.2 ± 0.6                                                       | 0.9 ± 0.01                                                 | Novo Nordisk, Denmark                    |
| Phthalylsulfathiazole       | Antibacterial    | Sulfonamide                    | 2.2 ± 0.5                                                       | 0.8 ± 0.02                                                 | Arkadia Pharmacy, Finland                |
| Folic acid                  | Vitamin          | One-carbon metabolism          | 0.7 ± 0.2                                                       | 0.7 ± 0.04                                                 | University of Helsinki Pharmacy, Finland |
